# Supplementary material
Source: PubMed Central journal article supplement (PMC7534631)
Supplement: EMBR-21-e49689-s009.pdf [file EMBR-21-e49689-s009.pdf]

## Fig4 panel B

### SNU719

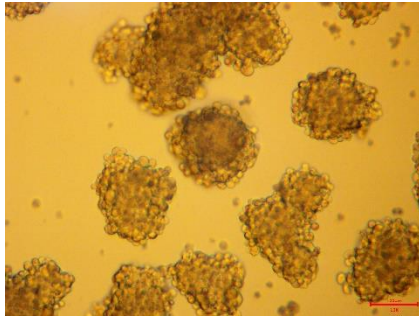

sh-control

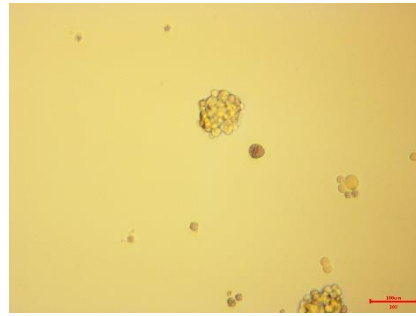

sh-2

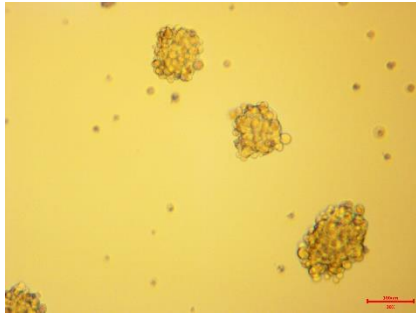

sh-3

## Fig.4 Panel D

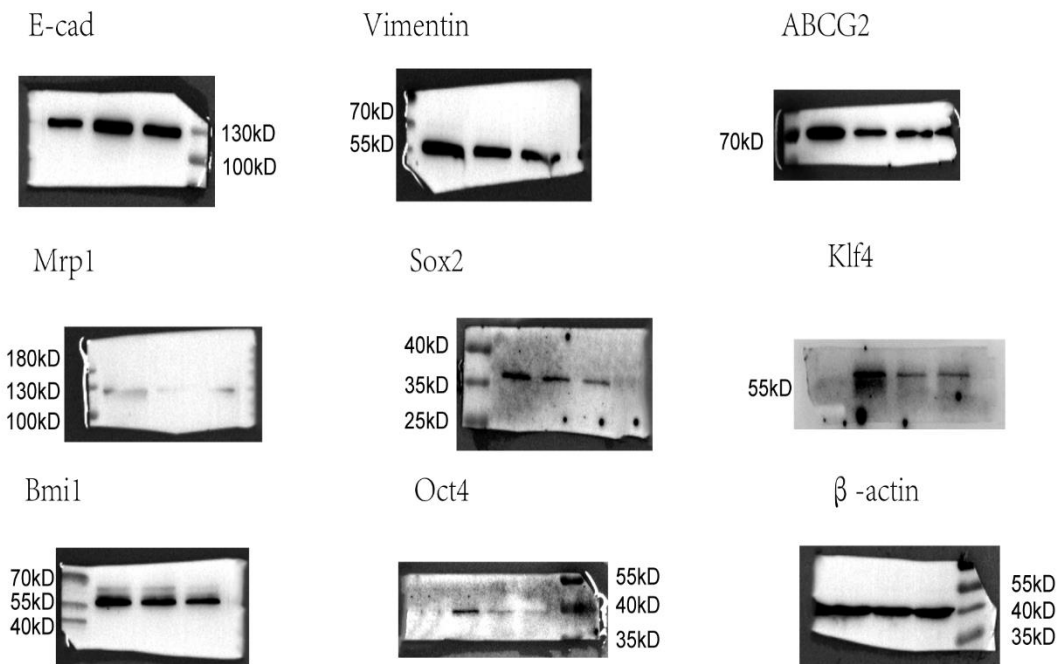

## Fig4 panel E

### Migration

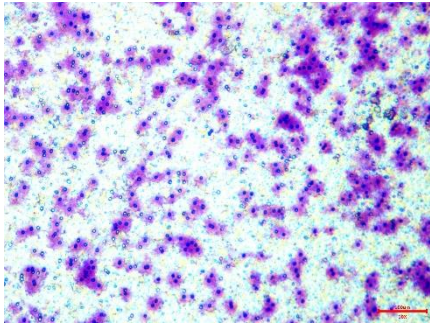

sh-control

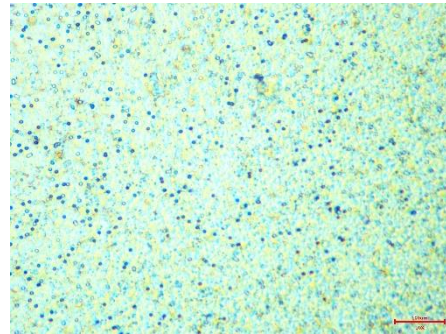

sh-2

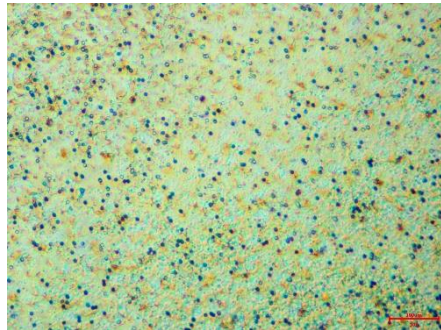

sh-3

### Invasion

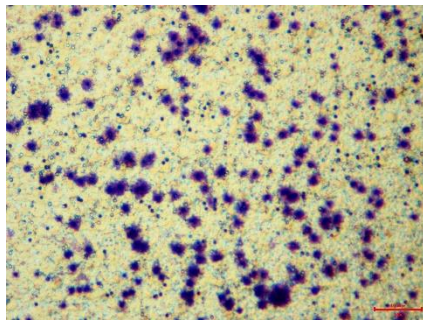

sh-control

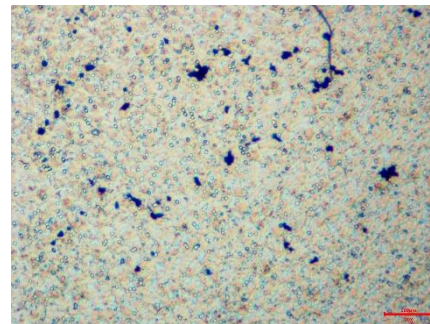

sh-2

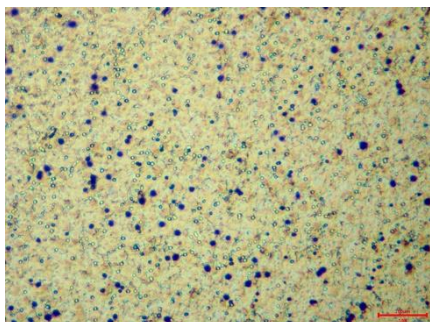

sh-3

**Fig4 panel F**

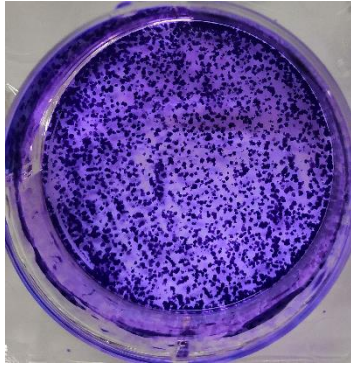

sh-control

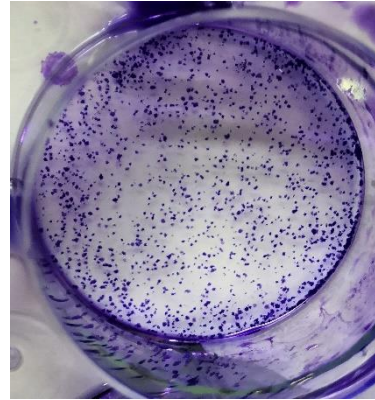

sh-2

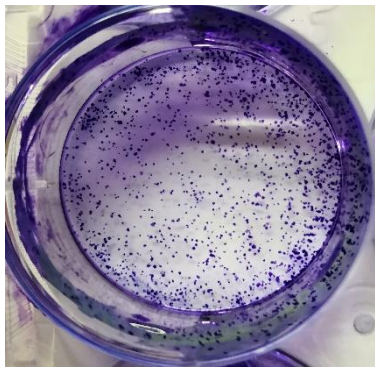

sh-3

**Fig4 panel I**

sh-control

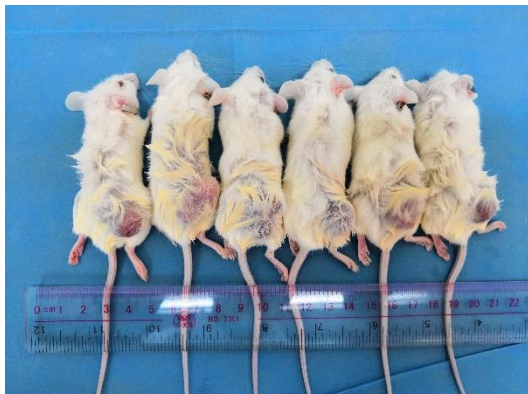

sh-2

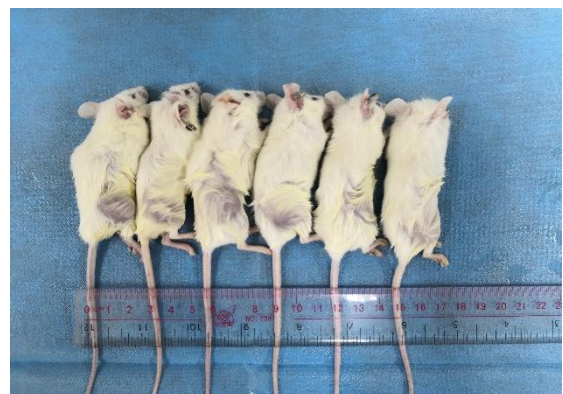



**Fig4 panel J**

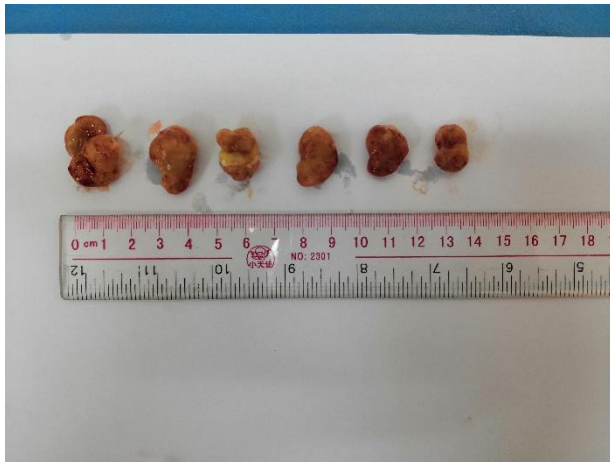

sh-control

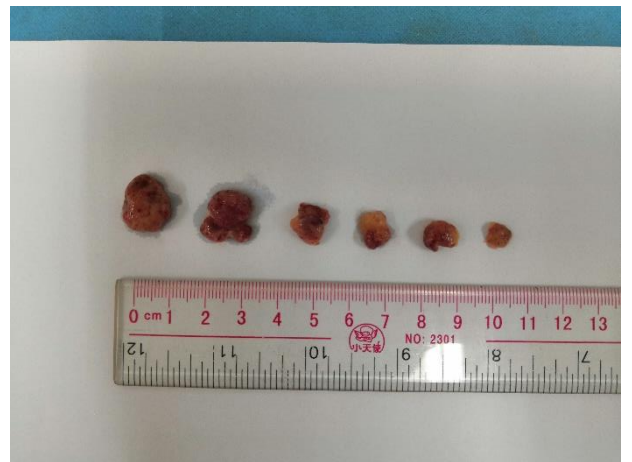

sh-2
